# Supplementary material for: Axon Regeneration Is Regulated by Ets–C/EBP Transcription Complexes Generated by Activation of the cAMP/Ca2+ Signaling Pathways
Source: PubMed Central journal article supplement (PMC4618690; doi:10.1371/journal.pgen.1005603), 2015-10-20
Supplement: pgen.1005603.s003.pdf [file pgen.1005603.s003.pdf]

**S1 Table. Raw data for genotypes tested by axotomy**

| Strain | Genotype                                      | No. of animals | No. of axons | No. of regeneration | P vs. control         |
|--------|-----------------------------------------------|----------------|--------------|---------------------|-----------------------|
| KU501  | <i>juls76</i>                                 | 27             | 54           | 41 (76%)            | -                     |
| KU544  | <i>ets-1; juls76</i>                          | 30             | 60           | 35 (58%)            | 0.0503 <sup>a</sup>   |
| KU545  | <i>ets-4; juls76</i>                          | 63             | 115          | 34 (30%)            | < 0.0001 <sup>a</sup> |
| KU546  | <i>ets-4; juls76; Punc-25::ets-4</i>          | 27             | 56           | 39 (70%)            | < 0.0001 <sup>b</sup> |
| KU547  | <i>ets-4; juls76; Pmec-7::ets-4</i>           | 26             | 52           | 11 (21%)            | 0.3464 <sup>b</sup>   |
| KU548  | <i>ets-4; juls76; Punc-25::svh-2</i>          | 33             | 55           | 33 (60%)            | 0.0002 <sup>b</sup>   |
| KU549  | <i>ets-4; juls76; Punc-25::ets-4(S73A)</i>    | 28             | 51           | 16 (31%)            | 0.8554 <sup>b</sup>   |
| KU550  | <i>ets-4; juls76; Punc-25::ets-4(S73E)</i>    | 28             | 50           | 32 (64%)            | < 0.0001 <sup>b</sup> |
| KU551  | <i>cebp-1(tm2807); juls76</i>                 | 28             | 59           | 7 (12%)             | < 0.0001 <sup>a</sup> |
| KU552  | <i>cebp-1(tm2807); juls76; Punc-25::svh-2</i> | 34             | 73           | 14 (19%)            | 0.3397 <sup>c</sup>   |
| KU553  | <i>acy-1; juls76</i>                          | 31             | 55           | 16 (29%)            | < 0.0001 <sup>a</sup> |
| KU503  | <i>svh-2; juls76</i>                          | 26             | 59           | 11 (19%)            | < 0.0001 <sup>a</sup> |
| KU555  | <i>svh-2; juls76; Psvh-2(6.2 kb)::svh-2</i>   | 27             | 53           | 37 (70%)            | < 0.0001 <sup>d</sup> |
| KU556  | <i>svh-2; juls76; Psvh-2(2.6 kb)::svh-2</i>   | 31             | 60           | 36 (60%)            | < 0.0001 <sup>d</sup> |
| KU557  | <i>svh-2; juls76; Psvh-2(0.5 kb)::svh-2</i>   | 32             | 55           | 18 (33%)            | 0.0912 <sup>d</sup>   |
| KU558  | <i>svh-2; juls76; Psvh-2(Ets-bm)::svh-2</i>   | 32             | 50           | 13 (26%)            | 0.3661 <sup>d</sup>   |
| KU559  | <i>svh-2; juls76; Psvh-2(CEBP-bm)::svh-2</i>  | 38             | 56           | 11 (20%)            | 1 <sup>d</sup>        |
| KU570  | <i>cebp-1(u819); juls76</i>                   | 31             | 62           | 0 (0%)              | < 0.0001 <sup>a</sup> |
| KU571  | <i>cebp-1(u819); juls76; Punc-25::svh-2</i>   | 38             | 76           | 6 (8%)              | 0.033 <sup>e</sup>    |
| KU572  | <i>acy-1; juls76; Punc-25::ets-4(S73E)</i>    | 47             | 84           | 29 (35%)            | 0.5798 <sup>f</sup>   |

a: KU501 as a control, b: KU545 as a control, c: KU551 as a control, d: KU503 as a control, e: KU570 as a control, f: KU553 as a control.
