# Supplementary material for: Axon Regeneration Is Regulated by Ets–C/EBP Transcription Complexes Generated by Activation of the cAMP/Ca2+ Signaling Pathways
Source: PubMed Central journal article supplement (PMC4618690; doi:10.1371/journal.pgen.1005603), 2015-10-20
Supplement: pgen.1005603.s004.pdf [file pgen.1005603.s004.pdf]

## S2 Table. Strains used in this study

| Strain | Genotype                                                        |
|--------|-----------------------------------------------------------------|
| KU501  | <i>juls76</i> II                                                |
| KU503  | <i>juls76</i> II; <i>svh-2(tm737)</i> X                         |
| KU544  | <i>juls76</i> II; <i>ets-1(ok286)</i> X                         |
| KU545  | <i>juls76</i> II; <i>ets-4(ok165)</i> X                         |
| KU551  | <i>juls76</i> II; <i>cebp-1(tm2807)</i> X                       |
| KU553  | <i>juls76</i> II; <i>acy-1(nu329)</i> III                       |
| KU555  | <i>juls76</i> II; <i>svh-2(tm737)</i> X; <i>kmEx529</i>         |
| KU556  | <i>juls76</i> II; <i>svh-2(tm737)</i> X; <i>kmEx530</i>         |
| KU557  | <i>juls76</i> II; <i>svh-2(tm737)</i> X; <i>kmEx531</i>         |
| KU558  | <i>juls76</i> II; <i>svh-2(tm737)</i> X; <i>kmEx532</i>         |
| KU559  | <i>juls76</i> II; <i>svh-2(tm737)</i> X; <i>kmEx533</i>         |
| KU546  | <i>juls76</i> II; <i>ets-4(ok165)</i> X; <i>kmEx534</i>         |
| KU547  | <i>juls76</i> II; <i>ets-4(ok165)</i> X; <i>kmEx535</i>         |
| KU548  | <i>juls76</i> II; <i>ets-4(ok165)</i> X; <i>kmEx501</i>         |
| KU552  | <i>juls76</i> II; <i>cebp-1(tm2807)</i> X; <i>kmEx501</i>       |
| KU549  | <i>juls76</i> II; <i>ets-4(ok165)</i> X; <i>kmEx536</i>         |
| KU550  | <i>juls76</i> II; <i>ets-4(ok165)</i> X; <i>kmEx537</i>         |
| KU560  | <i>lin-15 (n765)</i> X; <i>kmEx538</i> ; <i>kmEx539</i>         |
| KU561  | <i>lin-15 (n765)</i> X; <i>kmEx538</i> ; <i>kmEx540</i>         |
| KU562  | <i>lin-15 (n765)</i> X; <i>kmEx538</i> ; <i>kmEx541</i>         |
| KU563  | <i>lin-15 (n765)</i> X; <i>kmEx538</i> ; <i>kmEx542</i>         |
| KU564  | <i>lin-15 (n765)</i> X; <i>kmEx538</i> ; <i>kmEx543</i>         |
| KU565  | <i>ets-4(ok165)</i> <i>lin-15 (n765)</i> X; <i>kmEx538</i>      |
| KU566  | <i>cebp-1(tm2807)</i> <i>lin-15 (n765)</i> X; <i>kmEx538</i>    |
| KU567  | <i>dlk-1(km12)</i> I; <i>lin-15 (n765)</i> X; <i>kmEx538</i>    |
| KU568  | <i>acy-1(nu329)</i> III; <i>lin-15 (n765)</i> X; <i>kmEx538</i> |
| KU569  | <i>egl-19(ad695)</i> IV; <i>lin-15 (n765)</i> X; <i>kmEx538</i> |
